# Supplementary material for: Chemistry of group 9 dimetallaborane analogues of octaborane(12)
Source: Royal Society of Chemistry journal article supplement (doi:10.1039/c4dt03027c), 2014-10-31
Supplement: c4dt03027c1.pdf [file c4dt03027c1.pdf]

**SUPPLEMENTARY INFORMATION**

**Chemistry of Group 9 Dimetallaborane Analogues of  
Octaborane(12)**

*Subrat Kumar Barik, Dipak Kumar Roy, Sundargopal Ghosh\**

Department of Chemistry, Indian Institute of Technology Madras, Chennai 600036, India

Email: [sghosh@iitm.ac.in](mailto:sghosh@iitm.ac.in)

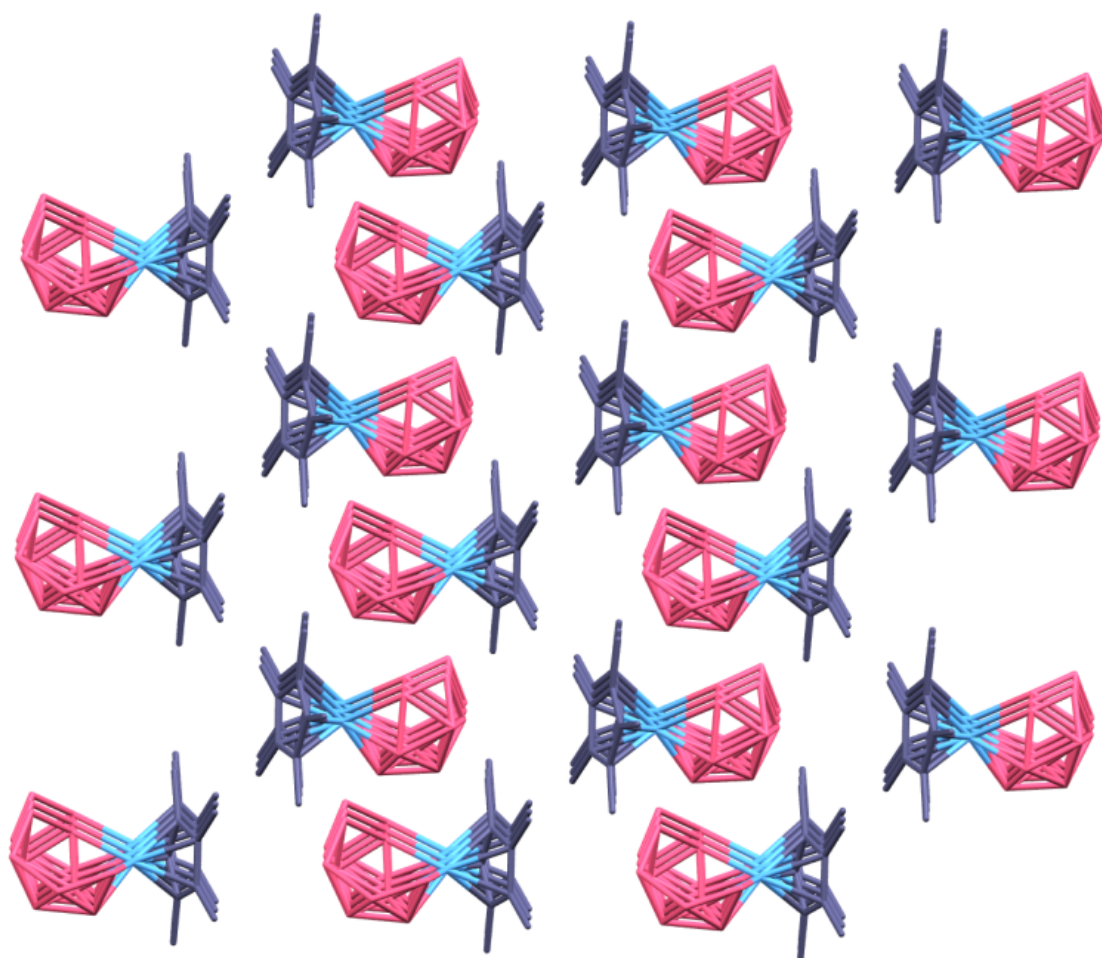

Fig. S1. Illustration of 3D packing view of **1** along *c* axis; Color code: C: violet; Co: cyan; B: pink; (hydrogen atoms are removed for clarity.)

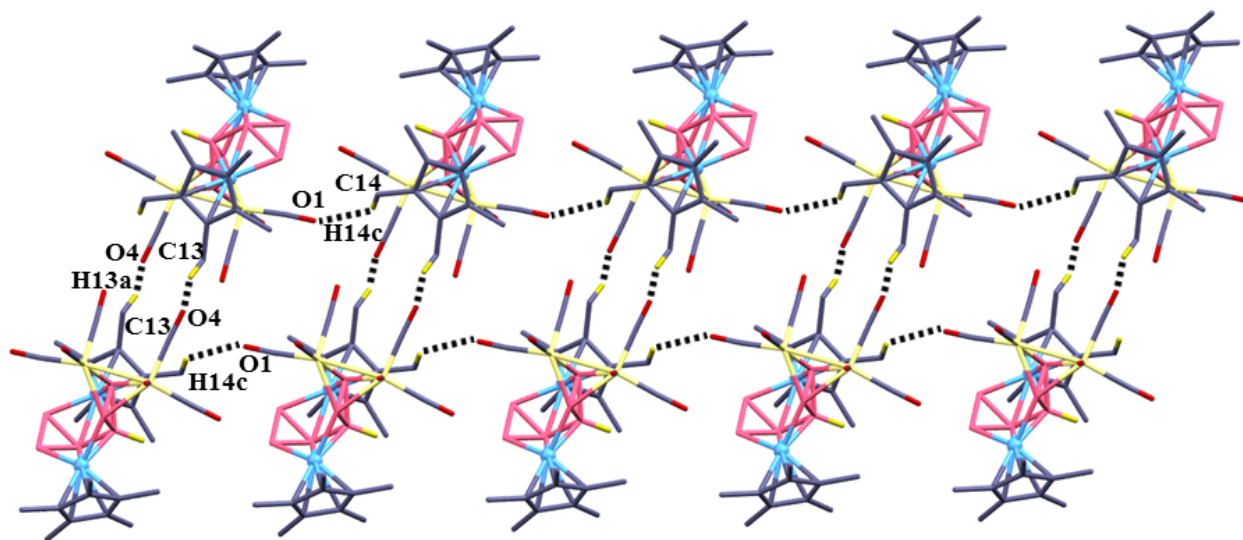

Fig. S2. The C-H...O hydrogen bonding interactions between the adjacent layered molecular units of **4** forming a 2D layer along the *c*-axis (hydrogen atoms except those, which have been taken part in the hydrogen bonding, are removed for clarity)

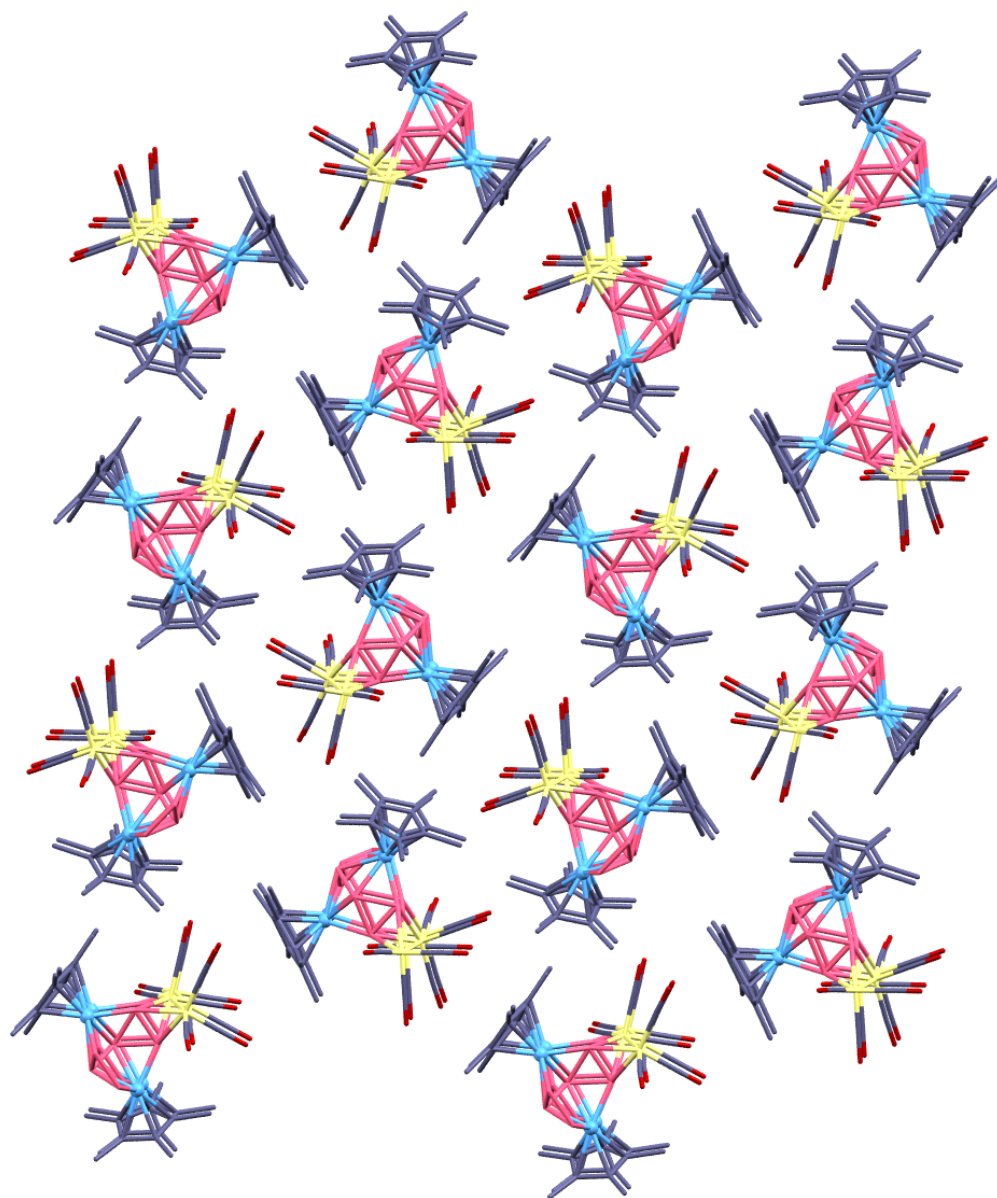

Fig. S3. 3D packing view along *a*-axis for **4** (hydrogen atoms are removed for clarity); Color code: Fe: Yellow; C: Violet; Co: Cyan; O: Scarlet red.

Table S1. Selected Structural Parameters and  $^{11}\text{B}$  NMR Chemical Shifts of **4**,  
 $[\{\text{Fe}_2(\text{CO})_6\}(\text{Cp}^*\text{Ru})_2(\text{CO})(\text{B}_6\text{H}_{10})]$  and  $[\{\text{Fe}_2(\text{CO})_6\}(\text{Cp}^*\text{Rh})_2(\text{B}_6\text{H}_{10})]$

| Compound                          | $\{\text{Fe}_2(\text{CO})_6\}(\text{Cp}^*\text{Ru})_2(\text{CO})(\text{B}_6\text{H}_{10})]$ | $[\{\text{Fe}_2(\text{CO})_6\}(\text{Cp}^*\text{Rh})_2(\text{B}_6\text{H}_{10})]$ | <b>4</b>                               |
|-----------------------------------|---------------------------------------------------------------------------------------------|-----------------------------------------------------------------------------------|----------------------------------------|
| av $d_{\text{M-B}}$ (Å)           | 2.320                                                                                       | 2.191                                                                             | 2.146                                  |
| av $d_{\text{B-B}}$ (Å)           | 1.753                                                                                       | 1.750                                                                             | 1.752                                  |
| $d_{\text{Fe-Fe}}$ (Å)            | 2.569                                                                                       | 2.580                                                                             | 2.578                                  |
| av $d_{\text{B-B}}$ (Å)           | 1.711                                                                                       | 1.706                                                                             | 1.687                                  |
| $d_{\text{B-B}}$ (Å) <sup>a</sup> | 1.711                                                                                       | 1.701                                                                             | 1.687                                  |
| Dihedral angle (deg) <sup>b</sup> | 149.77                                                                                      | 151.69                                                                            | 152.00                                 |
| $^{11}\text{B}$ NMR               | 47.1, 37.1, 29.9, 1.37, -2.70                                                               | 34.7, 28.1, 25.2, 16.4, 1.6, -12.3                                                | 45.5, 32.02, 26.94, 25.30, 9.08, -5.50 |

*a* distance between the fused B-B bond between two polyhedral, *b* angle between the planes

shown in the Chart 1
